# Supplementary material
Source: PubMed Central journal article supplement (PMC3650476)
Supplement: NIHMS463039-supplement-1_si_001.pdf [file NIHMS463039-supplement-1_si_001.pdf]

***Supplementary Information of A Novel Flame Retardant, “V6”: Measurements in Commercial Products, House Dust and Car Dust***

Mingliang Fang,<sup>†</sup> Thomas F. Webster,<sup>‡</sup> David Gooden,<sup>§</sup> Ellen M. Cooper,<sup>†</sup>  
Michael D. McClean<sup>‡</sup>, Courtney Carignan,<sup>‡</sup> Colleen Makey,<sup>‡</sup> and Heather M. Stapleton,<sup>\*, †</sup>

<sup>†</sup> Nicholas School of the Environment, Duke University, Durham, NC, USA;

<sup>‡</sup> Department of Environmental Health, Boston University School of Public Health, Boston, MA, USA;

<sup>§</sup> Department of Chemistry, Duke University, Durham, NC, USA;

\*corresponding author: [heather.stapleton@duke.edu](mailto:heather.stapleton@duke.edu)

**Table of Contents**

|                                                                                                                                                                       |    |
|-----------------------------------------------------------------------------------------------------------------------------------------------------------------------|----|
| <b>Table S1.</b> Sampling information of car dust samples.....                                                                                                        | S2 |
| <b>FIGURE S1.</b> Total ion chromatography (TIC) of the V6 commercial product, and purified V6, and methanol blank using ESI (±) full scan, LC/MS-MS.....             | S3 |
| <b>Table S2.</b> Calculated V6 mass using ESI, APCI and standard addition (SA) methods .....                                                                          | S4 |
| <b>FIGURE S2.</b> Flow charts of cleanup step of V6 in dust samples.. .....                                                                                           | S5 |
| <b>FIGURE S3.</b> Comparison of d-TDCPP response in pure organic solvent and that in the dust samples under both ESI positive and APCI positive ionization mode. .... | S6 |

---

**Table S1.** Sampling information of car dust samples

| <b>Sample #</b> | <b>Car Manufacturer</b> | <b>Car Model</b> | <b>Production Year</b> | <b>Sampling Date</b> |
|-----------------|-------------------------|------------------|------------------------|----------------------|
| #1              | Honda                   | Odyssey          | 1998                   | 01-Sep-2011          |
| #2              | Mitsubishi              | Outlander        | 2006                   | 20-Jul-2011          |
| #3              | Mazda                   | Protégé          | 2003                   | 27-Aug-2011          |
| #4              | Nissan                  | Altima           | 2004                   | 13-Aug-2011          |
| #5              | Honda                   | Accord           | 1999                   | 13-Jul-2011          |
| #6              | Volvo                   | 850              | 1995                   | 05-Aug-2011          |
| #7              | Toyota                  | Camry            | 2007                   | 16-Jul-2011          |
| #8              | Nissan                  | Altima           | 2002                   | 28-Jul-2011          |
| #9              | Subaru                  | Outback          | 1999                   | 14-Jul-2011          |
| #10             | Chrysler                | Voyager LX       | 2003                   | 24-Jul-2011          |
| #11             | Buick                   | LeSabre          | 1997                   | 27-Jul-2011          |
| #12             | Honda                   | Civic            | 2008                   | 10-Jul-2011          |
| #13             | Mazda                   | 3                | 2007                   | 30-Jun-2011          |
| #14             | Honda                   | Pilot            | 2007                   | 04-Jun-2011          |
| #15             | Kia                     | Spectra          | 2005                   | 22-Jun-2011          |
| #16             | Toyota                  | Prius            | 2004                   | 08-Jun-2011          |
| #17             | Subaru                  | Outback          | 2005                   | 15-Jun-2011          |
| #18             | Toyota                  | Prius            | 2006                   | 07-Jul-2011          |
| #19             | Honda                   | Accord           | 2006                   | 10-Jun-2011          |
| #20             | Toyota                  | Camry            | 2004                   | 16-Jul-2011          |

---

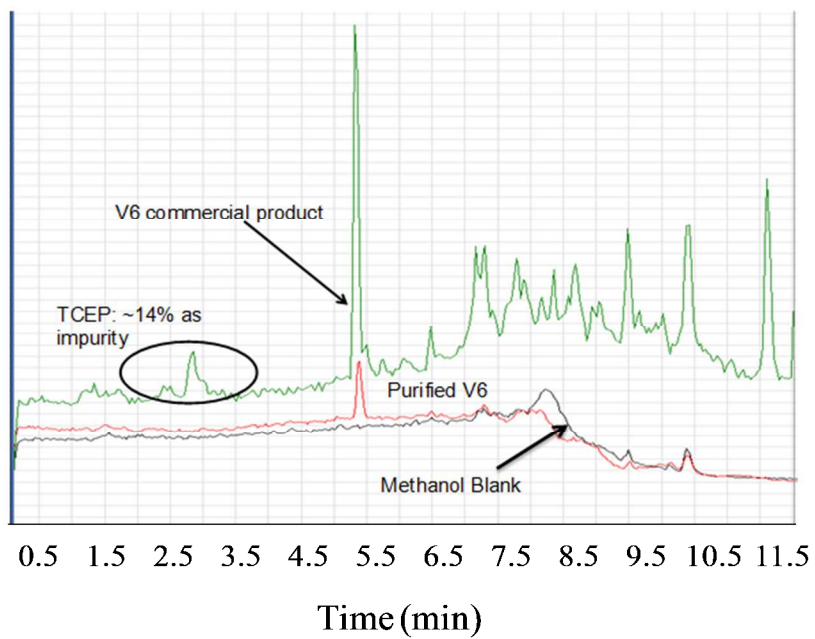

**FIGURE S1.** Total ion chromatography (TIC) of the V6 commercial product, and purified V6, and methanol blank using ESI ( $\pm$ ) full scan, LC/MS-MS

---

**Table S2.** Calculated V6 mass using ESI, APCI and standard addition (SA) methods

|          | ESI (ng) | SA (ng) | APCI (ng) |
|----------|----------|---------|-----------|
| Sample 1 | 186      | 195     | 186       |
| Sample 2 | 114      | 93      | 103       |
| Sample 3 | 229      | 181     | 167       |

---

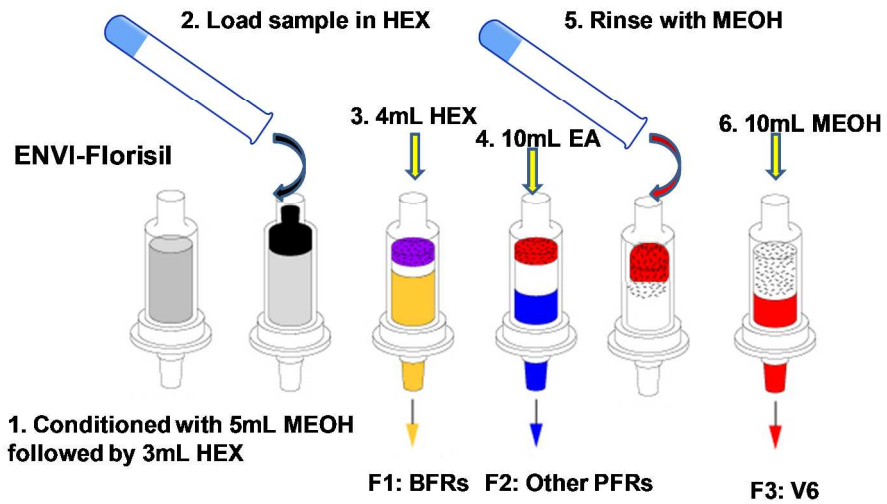

**FIGURE S2.** Flow charts of cleanup step of V6 in dust samples. HEX-hexane; MEOH-methanol; EA: ethyl acetate.

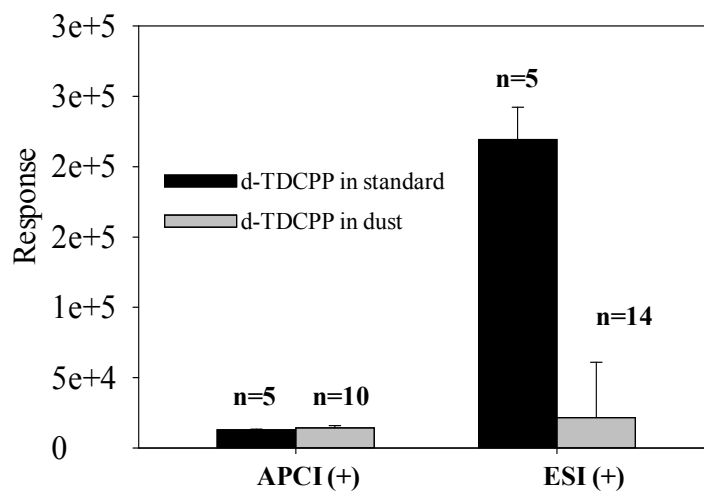

**FIGURE S3.** Comparison of d-TDCPP response in pure organic solvent and that in the dust samples under both ESI positive and APCI positive ionization mode.
